# Supplementary material for: The Clinical Presentation of Puumala Hantavirus Induced Hemorrhagic Fever with Renal Syndrome Is Related to Plasma Glucose Concentration
Source: MDPI journal article supplement (doi:10.3390/v13061177), 2021-06-20
Supplement: s1 [file s1]

The abbreviations in the following supplementary tables are: BMI, body mass index; SE, standard error of the mean; CRP, C-reactive protein.

**Table S1.**

| Header                 | Minimum blood platelet count |       |        |                 |
|------------------------|------------------------------|-------|--------|-----------------|
|                        | B                            | SE    | Beta   | <i>p</i> -value |
| Maximum plasma glucose | −4.083                       | 1.390 | −0.251 | 0.004           |
| BMI                    | 0.996                        | 0.935 | 0.93   | 0.288           |
| Age                    | 0.964                        | 0.288 | 0.282  | 0.001           |
| Sex                    | −8.044                       | 7.414 | −0.089 | 0.280           |

**Table S2.**

|                        | Maximum blood hematocrit |       |        |                 |
|------------------------|--------------------------|-------|--------|-----------------|
|                        | B                        | SE    | Beta   | <i>p</i> -value |
| Maximum plasma glucose | 0.006                    | 0.002 | 0.270  | 0.002           |
| BMI                    | 0.002                    | 0.001 | 0.142  | 0.108           |
| Age                    | −0.001                   | 0.000 | −0.176 | 0.039           |
| Sex                    | −0.016                   | 0.010 | −0.123 | 0.135           |

**Table S3.**

|                        | Minimum plasma albumin |       |        |                 |
|------------------------|------------------------|-------|--------|-----------------|
|                        | B                      | SE    | Beta   | <i>p</i> -value |
| Maximum plasma glucose | −0.580                 | 0.181 | −0.374 | 0.002           |
| BMI                    | 0.213                  | 0.144 | 0.178  | 0.144           |
| Age                    | −0.063                 | 0.045 | −0.161 | 0.167           |
| Sex                    | −2.302                 | 1.192 | −0.218 | 0.058           |

**Table S4.**

|                        | Maximum blood leukocytes |       |        |                 |
|------------------------|--------------------------|-------|--------|-----------------|
|                        | B                        | SE    | Beta   | <i>p</i> -value |
| Maximum plasma glucose | 0.931                    | 0.209 | 0.378  | 0.000           |
| BMI                    | −0.122                   | 0.141 | −0.069 | 0.430           |
| Age                    | −0.083                   | 0.043 | −0.160 | 0.057           |
| Sex                    | −0.188                   | 1.115 | −0.014 | 0.666           |

**Table S5.**

|                        | Maximum plasma CRP |       |        |                 |
|------------------------|--------------------|-------|--------|-----------------|
|                        | B                  | SE    | Beta   | <i>p</i> -value |
| Maximum plasma glucose | 3.073              | 1.731 | 0.160  | 0.078           |
| BMI                    | −0.738             | 1.199 | −0.057 | 0.539           |
| Age                    | 0.429              | 0.359 | 0.106  | 0.234           |
| Sex                    | −18.681            | 9.264 | −0.173 | 0.046           |

Table S6.

|                        | Weight change |       |        |                 |
|------------------------|---------------|-------|--------|-----------------|
|                        | B             | SE    | Beta   | <i>p</i> -value |
| Maximum plasma glucose | 0.323         | 0.094 | 0.308  | 0.001           |
| BMI                    | −0.014        | 0.064 | −0.020 | 0.832           |
| Age                    | 0.024         | 0.020 | 0.104  | 0.239           |
| Sex                    | −0.541        | 0.508 | −0.092 | 0.290           |

Table S7.

|                        | Length of hospital stay |       |        |                 |
|------------------------|-------------------------|-------|--------|-----------------|
|                        | B                       | SE    | Beta   | <i>p</i> -value |
| Maximum plasma glucose | 0.322                   | 0.106 | 0.269  | 0.003           |
| BMI                    | −0.075                  | 0.071 | −0.096 | 0.292           |
| Age                    | 0.035                   | 0.022 | 0.140  | 0.109           |
| Sex                    | 0.101                   | 0.564 | 0.015  | 0.858           |
